# Supplementary material for: Common genetic variants, acting additively, are a major source of risk for autism
Source: PubMed Central journal article supplement (PMC3579743; doi:10.1186/2040-2392-3-9), 2012-10-15
Supplement: 2040-2392-3-9-S1.pdf [file 2040-2392-3-9-S1.pdf]

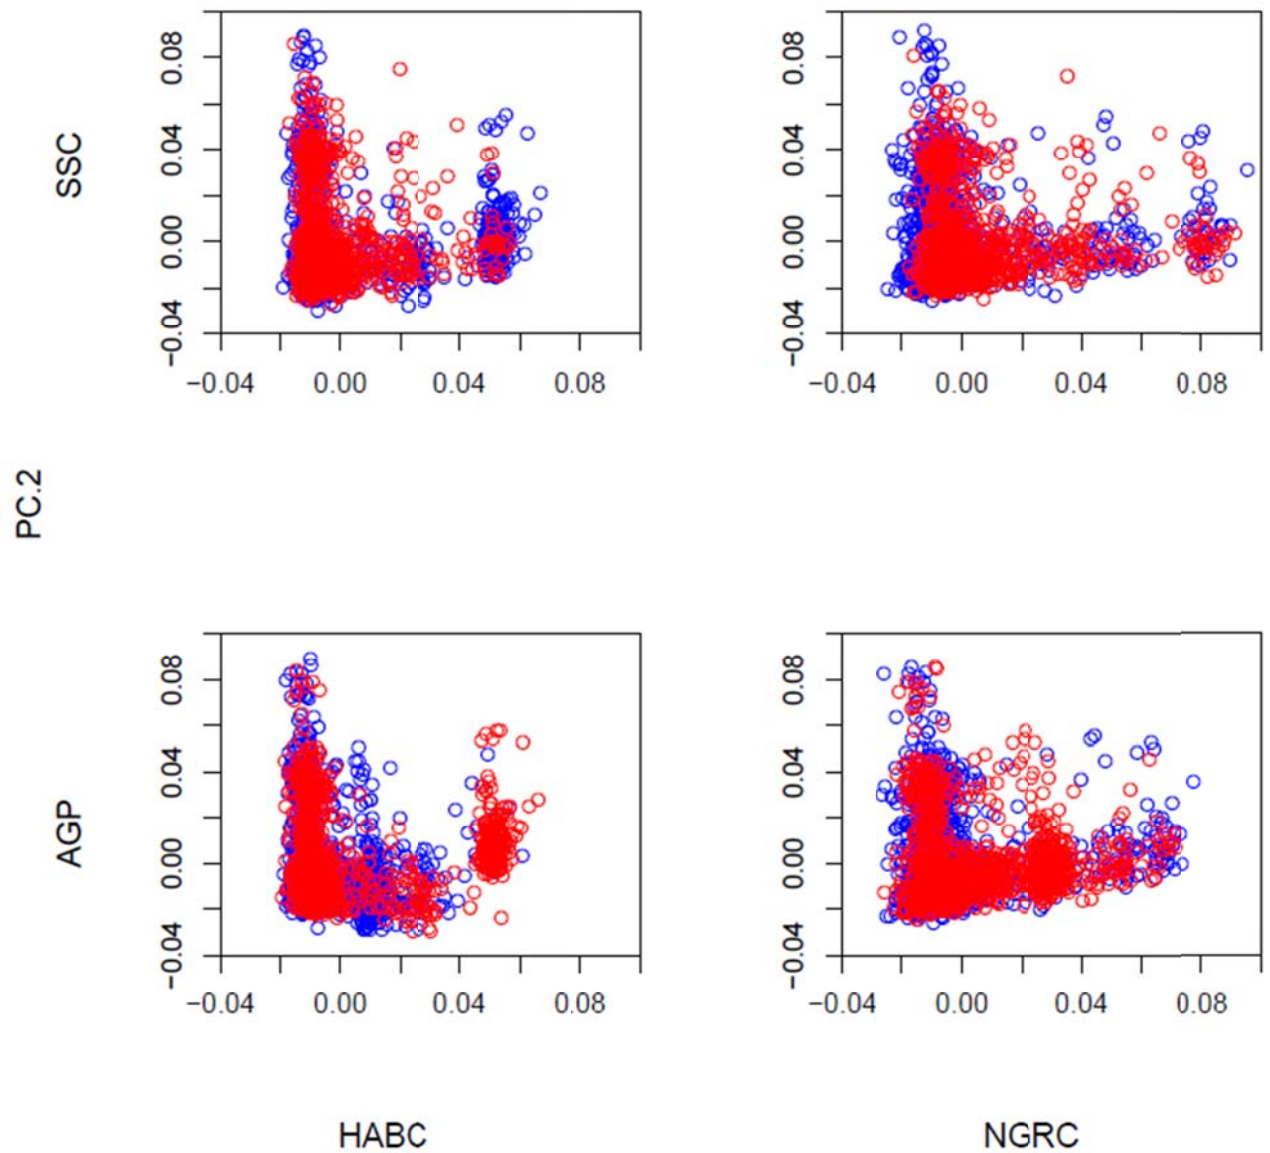

Supplementary Figure 1. Ancestry projects for principal component 1 (PC.1) versus principal component 2 (PC.2) for the samples used in the analysis of heritability. Red dots represent subjects with an ASD diagnosis and blue are controls. HealthABC = HABC.
